# Supplementary material for: Frontotemporal networks and behavioral symptoms in primary progressive aphasia
Source: PubMed Central journal article supplement (PMC4831038; doi:10.1212/wnl.0000000000002579), 2016-04-12
Supplement: supp_WNL.0000000000002579_Tables.pdf [file supp_WNL.0000000000002579_Tables.pdf]

**Table e-1. Correlations between tract-specific measurements of the tracts of interest and neuropsychiatric assessments in PPA patients.**

| Tract            | DTI                       | FBI negative scores                | FBI positive scores                | FBI total scores                   |
|------------------|---------------------------|------------------------------------|------------------------------------|------------------------------------|
| <b>Left UF</b>   | N streamlines             | Rho Spearman = -0.460<br>p < 0.001 | Rho Spearman = -0.530<br>p = 0.001 | Rho Spearman = -0.549<br>p = 0.001 |
|                  | Fractional anisotropy     | Rho Spearman = -0.450<br>p < 0.001 | Rho Spearman = -0.500<br>p < 0.001 | Rho Spearman = -0.490<br>p < 0.001 |
|                  | Axial diffusivity         | Rho Spearman = 0.575<br>p < 0.001  | Rho Spearman = 0.400<br>p < 0.001  | Rho Spearman = 0.450<br>p < 0.001  |
|                  | Perpendicular diffusivity | Rho Spearman = 0.540<br>p < 0.001  | Rho Spearman = 0.600<br>p < 0.001  | Rho Spearman = 0.540<br>p < 0.001  |
| <b>Right UF</b>  | N streamlines             | Rho Spearman = 0.120<br>p = 0.045  | Rho Spearman = -0.038<br>p = 0.915 | Rho Spearman = 0.071<br>p = 0.852  |
|                  | Fractional anisotropy     | Rho Spearman = -0.120<br>p = 0.321 | Rho Spearman = -0.231<br>p = 0.609 | Rho Spearman = -0.321<br>p = 0.432 |
|                  | Axial diffusivity         | Rho Spearman = 0.443<br>p = 0.005  | Rho Spearman = 0.432<br>p = 0.005  | Rho Spearman = 0.421<br>p = 0.001  |
|                  | Perpendicular diffusivity | Rho Spearman = 0.497<br>p < 0.001  | Rho Spearman = 0.576<br>p < 0.001  | Rho Spearman = 0.580<br>p < 0.001  |
| <b>Left IFOF</b> | N streamlines             | Rho Spearman = 0.111<br>p = 0.787  | Rho Spearman = 0.243<br>p = 0.154  | Rho Spearman = 0.221<br>p = 0.432  |
|                  | Fractional anisotropy     | Rho Spearman = -0.332<br>p = 0.143 | Rho Spearman = -0.076<br>p = 0.667 | Rho Spearman = -0.259<br>p = 0.780 |
|                  | Axial diffusivity         | Rho Spearman = 0.456<br>p = 0.235  | Rho Spearman = -0.045<br>p = 0.987 | Rho Spearman = 0.234<br>p = 0.567  |
|                  | Perpendicular diffusivity | Rho Spearman = 0.768<br>p = 0.078  | Rho Spearman = 0.346<br>p = 0.890  | Rho Spearman = 0.789<br>p = 0.567  |

|                   |                           |                                    |                                    |                                    |
|-------------------|---------------------------|------------------------------------|------------------------------------|------------------------------------|
| <b>Right IFOF</b> | N streamlines             | Rho Spearman = 0.678<br>p = 0.908  | Rho Spearman = 0.531<br>p = 0.543  | Rho Spearman = 0.721<br>p = 0.772  |
|                   | Fractional anisotropy     | Rho Spearman = -0.523<br>p = 0.852 | Rho Spearman = -0.863<br>p = 0.642 | Rho Spearman = -0.074<br>p = 0.732 |
|                   | Axial diffusivity         | Rho Spearman = 0.532<br>p = 0.345  | Rho Spearman = 0.563<br>p = 0.563  | Rho Spearman = 0.341<br>p = 0.145  |
|                   | Perpendicular diffusivity | Rho Spearman = 0.342<br>p = 0.126  | Rho Spearman = 0.231<br>p = 0.453  | Rho Spearman = 0.171<br>p = 0.876  |
| <b>Left ILF</b>   | N streamlines             | Rho Spearman = 0.753<br>p = 0.654  | Rho Spearman = 0.165<br>p = 0.456  | Rho Spearman = 0.176<br>p = 0.765  |
|                   | Fractional anisotropy     | Rho Spearman = -0.564<br>p = 0.900 | Rho Spearman = 0.453<br>p = 0.653  | Rho Spearman = -0.078<br>p = 0.564 |
|                   | Axial diffusivity         | Rho Spearman = 0.546<br>p = 0.098  | Rho Spearman = 0.075<br>p = 0.908  | Rho Spearman = 0.234<br>p = 0.567  |
|                   | Perpendicular diffusivity | Rho Spearman = 0.456<br>p = 0.455  | Rho Spearman = -0.567<br>p = 0.564 | Rho Spearman = 0.456<br>p = 0.456  |
| <b>Right ILF</b>  | N streamlines             | Rho Spearman = 0.056<br>p = 0.456  | Rho Spearman = 0.123<br>p = 0.389  | Rho Spearman = 0.245<br>p = 0.489  |
|                   | Fractional anisotropy     | Rho Spearman = -0.345<br>p = 0.134 | Rho Spearman = -0.089<br>p = 0.789 | Rho Spearman = -0.453<br>p = 0.378 |
|                   | Axial diffusivity         | Rho Spearman = 0.345<br>p = 0.231  | Rho Spearman = 0.245<br>p = 0.456  | Rho Spearman = 0.345<br>p = 0.567  |
|                   | Perpendicular diffusivity | Rho Spearman = 0.456<br>p = 0.078  | Rho Spearman = 0.678<br>p = 0.890  | Rho Spearman = 0.356<br>p = 0.145  |

UF = Uncinate Fasciculus; IFOF = Inferior Fronto-Occipital Fasciculus; ILF = Inferior Longitudinal Fasciculus; FBI = Frontal Behavioral Inventory.  
N streamlines = Number of streamlines

**Table e-2. Correlations between cortical thickness analysis of the orbitofrontal and anterior temporal lobe cortices and neuropsychiatric assessments in PPA patients.**

| <b>Region</b>    | <b>FBI negative scores</b>         | <b>FBI positive scores</b>         | <b>FBI total scores</b>            |
|------------------|------------------------------------|------------------------------------|------------------------------------|
| <b>Left OFC</b>  | Rho Spearman = -0.460<br>p = 0.001 | Rho Spearman = -0.523<br>p = 0.001 | Rho Spearman = -0.534<br>p = 0.001 |
| <b>Right OFC</b> | Rho Spearman = -0.323<br>p = 0.099 | Rho Spearman = -0.467<br>p = 0.004 | Rho Spearman = -0.379<br>p = 0.015 |
| <b>Left ATL</b>  | Rho Spearman = -0.521<br>p = 0.001 | Rho Spearman = -0.590<br>p < 0.001 | Rho Spearman = -0.580<br>p < 0.001 |
| <b>Right ATL</b> | Rho Spearman = -0.332<br>p = 0.049 | Rho Spearman = -0.499<br>p = 0.004 | Rho Spearman = -0.467<br>p = 0.010 |

FBI = Frontal Behavioral Inventory; OFC = orbitofrontal cortex; ATL= anterior temporal lobe cortex.

**Table e-3. Correlations between cortical thickness analysis of the left orbitofrontal and left anterior temporal lobe cortices and tract-specific measurements of the tracts of interest in the left hemisphere.**

|                                                 |                           | <b>Left OFC</b>                    | <b>Left ATL</b>                    |
|-------------------------------------------------|---------------------------|------------------------------------|------------------------------------|
| <b>Left Uncinate fasciculus</b>                 | N streamlines             | Rho Spearman = 0.324<br>p = 0.125  | Rho Spearman = 0.567<br>p = 0.004  |
|                                                 | Fractional anisotropy     | Rho Spearman = 0.524<br>p = 0.001  | Rho Spearman = 0.488<br>p = 0.003  |
|                                                 | Axial diffusivity         | Rho Spearman = -0.378<br>p = 0.007 | Rho Spearman = -0.570<br>p = 0.001 |
|                                                 | Perpendicular diffusivity | Rho Spearman = -0.513<br>p = 0.002 | Rho Spearman = -0.580<br>p = 0.001 |
| <b>Left Inferior frontooccipital fasciculus</b> | N streamlines             | Rho Spearman = 0.008<br>p = 0.689  | Rho Spearman = 0.089<br>p = 0.956  |
|                                                 | Fractional anisotropy     | Rho Spearman = 0.342<br>p = 0.132  | Rho Spearman = 0.035<br>p = 0.918  |
|                                                 | Axial diffusivity         | Rho Spearman = -0.090<br>p = 0.943 | Rho Spearman = -0.090<br>p = 0.678 |
|                                                 | Perpendicular diffusivity | Rho Spearman = -0.453<br>p = 0.178 | Rho Spearman = 0.089<br>p = 0.900  |
| <b>Left Inferior longitudinal fasciculus</b>    | N streamlines             | Rho Spearman = -0.345<br>p = 0.234 | Rho Spearman = -0.278<br>p = 0.342 |
|                                                 | Fractional anisotropy     | Rho Spearman = -0.198<br>p = 0.456 | Rho Spearman = -0.147<br>p = 0.564 |
|                                                 | Axial diffusivity         | Rho Spearman = -0.089<br>p = 0.456 | Rho Spearman = -0.189<br>p = 0.390 |
|                                                 | Perpendicular diffusivity | Rho Spearman = 0.089<br>p = 0.889  | Rho Spearman = -0.078<br>p = 0.990 |

OFC = orbitofrontal cortex; ATL= anterior temporal lobe cortex.

N streamlines = Number of streamlines

**Table e-4. Correlations between cortical thickness analysis of the right orbitofrontal and right anterior temporal lobe cortices and tract-specific measurements of the tracts of interest in the right hemisphere.**

|                                                  |                           | <b>Right OFC</b>                   | <b>Right ATL</b>                   |
|--------------------------------------------------|---------------------------|------------------------------------|------------------------------------|
| <b>Right Uncinate fasciculus</b>                 | N streamlines             | Rho Spearman = 0.023<br>p = 0.901  | Rho Spearman = 0.236<br>p = 0.187  |
|                                                  | Fractional anisotropy     | Rho Spearman = 0.043<br>p = 0.812  | Rho Spearman = 0.067<br>p = 0.712  |
|                                                  | Axial diffusivity         | Rho Spearman = -0.007<br>p = 0.968 | Rho Spearman = -0.464<br>p = 0.007 |
|                                                  | Perpendicular diffusivity | Rho Spearman = -0.207<br>p = 0.248 | Rho Spearman = -0.615<br>p < 0.001 |
| <b>Right Inferior frontooccipital fasciculus</b> | N streamlines             | Rho Spearman = -0.036<br>p = 0.841 | Rho Spearman = -0.181<br>p = 0.312 |
|                                                  | Fractional anisotropy     | Rho Spearman = -0.140<br>p = 0.438 | Rho Spearman = 0.085<br>p = 0.639  |
|                                                  | Axial diffusivity         | Rho Spearman = 0.023<br>p = 0.899  | Rho Spearman = -0.011<br>p = 0.953 |
|                                                  | Perpendicular diffusivity | Rho Spearman = 0.077<br>p = 0.668  | Rho Spearman = -0.106<br>p = 0.557 |
| <b>Right Inferior longitudinal fasciculus</b>    | N streamlines             | Rho Spearman = -0.347<br>p = 0.048 | Rho Spearman = -0.157<br>p = 0.384 |
|                                                  | Fractional anisotropy     | Rho Spearman = -0.076<br>p = 0.672 | Rho Spearman = 0.118<br>p = 0.514  |
|                                                  | Axial diffusivity         | Rho Spearman = 0.309<br>p = 0.081  | Rho Spearman = -0.148<br>p = 0.412 |
|                                                  | Perpendicular diffusivity | Rho Spearman = 0.211<br>p = 0.238  | Rho Spearman = -0.189<br>p = 0.292 |

OFC = orbitofrontal cortex; ATL= anterior temporal lobe cortex.

N streamlines = Number of streamlines

**Table e-5. Correlations between tract-specific measurements of the tracts of interest and neuropsychiatric assessments in patients with Logopenic variant of Primary Progressive Aphasia.**

| Tract             | DTI                       | FBI negative scores                | FBI positive scores                | FBI total scores                   |
|-------------------|---------------------------|------------------------------------|------------------------------------|------------------------------------|
| <b>Left UF</b>    | N streamlines             | Rho Spearman = -0.636<br>p = 0.124 | Rho Spearman = -0.128<br>p = 0.784 | Rho Spearman = -0.667<br>p = 0.102 |
|                   | Fractional anisotropy     | Rho Spearman = -0.527<br>p = 0.224 | Rho Spearman = -0.385<br>p = 0.393 | Rho Spearman = -0.414<br>p = 0.355 |
|                   | Axial diffusivity         | Rho Spearman = 0.927<br>p = 0.003  | Rho Spearman = 0.055<br>p = 0.907  | Rho Spearman = 0.847<br>p = 0.016  |
|                   | Perpendicular diffusivity | Rho Spearman = 0.782<br>p = 0.038  | Rho Spearman = -0.092<br>p = 0.845 | Rho Spearman = 0.775<br>p = 0.041  |
| <b>Right UF</b>   | N streamlines             | Rho Spearman = -0.459<br>p = 0.301 | Rho Spearman = -0.426<br>p = 0.341 | Rho Spearman = -0.691<br>p = 0.086 |
|                   | Fractional anisotropy     | Rho Spearman = -0.655<br>p = 0.111 | Rho Spearman = 0.165<br>p = 0.723  | Rho Spearman = -0.631<br>p = 0.129 |
|                   | Axial diffusivity         | Rho Spearman = 0.872<br>p = 0.011  | Rho Spearman = -0.019<br>p = 0.969 | Rho Spearman = -0.631<br>p = 0.129 |
|                   | Perpendicular diffusivity | Rho Spearman = 0.746<br>p = 0.054  | Rho Spearman = -0.165<br>p = 0.723 | Rho Spearman = 0.685<br>p = 0.090  |
| <b>Left IFOF</b>  | N streamlines             | Rho Spearman = -0.036<br>p = 0.938 | Rho Spearman = 0.147<br>p = 0.753  | Rho Spearman = -0.108<br>p = 0.818 |
|                   | Fractional anisotropy     | Rho Spearman = -0.600<br>p = 0.154 | Rho Spearman = 0.422<br>p = 0.345  | Rho Spearman = -0.505<br>p = 0.248 |
|                   | Axial diffusivity         | Rho Spearman = 0.709<br>p = 0.074  | Rho Spearman = 0.000<br>p = 1.000  | Rho Spearman = 0.450<br>p = 0.310  |
|                   | Perpendicular diffusivity | Rho Spearman = 0.873<br>p = 0.010  | Rho Spearman = -0.073<br>p = 0.876 | Rho Spearman = 0.811<br>p = 0.027  |
| <b>Right IFOF</b> | N streamlines             | Rho Spearman = 0.073<br>p = 0.877  | Rho Spearman = -0.239<br>p = 0.606 | Rho Spearman = -0.018<br>p = 0.969 |
|                   | Fractional anisotropy     | Rho Spearman = -0.800<br>p = 0.031 | Rho Spearman = 0.220<br>p = 0.635  | Rho Spearman = -0.739<br>p = 0.058 |
|                   | Axial diffusivity         | Rho Spearman = 0.455<br>p = 0.305  | Rho Spearman = 0.128<br>p = 0.784  | Rho Spearman = 0.252<br>p = 0.585  |
|                   | Perpendicular diffusivity | Rho Spearman = 0.818<br>p = 0.024  | Rho Spearman = -0.018<br>p = 0.969 | Rho Spearman = 0.757<br>p = 0.049  |
| <b>Left ILF</b>   | N streamlines             | Rho Spearman = -0.436<br>p = 0.328 | Rho Spearman = -0.771<br>p = 0.042 | Rho Spearman = -0.631<br>p = 0.129 |
|                   | Fractional anisotropy     | Rho Spearman = -0.873<br>p = 0.100 | Rho Spearman = 0.220<br>p = 0.635  | Rho Spearman = -0.739<br>p = 0.058 |
|                   | Axial diffusivity         | Rho Spearman = 0.491<br>p = 0.263  | Rho Spearman = 0.018<br>p = 0.969  | Rho Spearman = 0.559<br>p = 0.192  |

|                  |                           |                                    |                                    |                                    |
|------------------|---------------------------|------------------------------------|------------------------------------|------------------------------------|
|                  | Perpendicular diffusivity | Rho Spearman = 0.800<br>p = 0.310  | Rho Spearman = -0.147<br>p = 0.753 | Rho Spearman = 0.703<br>p = 0.078  |
| <b>Right ILF</b> | N streamlines             | Rho Spearman = -0.109<br>p = 0.816 | Rho Spearman = 0.385<br>p = 0.383  | Rho Spearman = 0.180<br>p = 0.699  |
|                  | Fractional anisotropy     | Rho Spearman = -0.691<br>p = 0.086 | Rho Spearman = 0.312<br>p = 0.496  | Rho Spearman = -0.505<br>p = 0.248 |
|                  | Axial diffusivity         | Rho Spearman = 0.509<br>p = 0.243  | Rho Spearman = 0.330<br>p = 0.469  | Rho Spearman = 0.414<br>p = 0.355  |
|                  | Perpendicular diffusivity | Rho Spearman = 0.891<br>p = 0.070  | Rho Spearman = -0.018<br>p = 0.969 | Rho Spearman = 0.757<br>p = 0.049  |

UF = Uncinate Fasciculus; IFOF = Inferior Fronto-Occipital Fasciculus; ILF = Inferior Longitudinal Fasciculus; FBI = Frontal Behavioral Inventory.  
N streamlines = Number of streamlines

**Table e-6. Correlations between tract-specific measurements of the tracts of interest and neuropsychiatric assessments in patients with Agrammatic variant of Primary Progressive Aphasia.**

| Tract             | DTI                       | FBI negative scores                | FBI positive scores                | FBI total scores                   |
|-------------------|---------------------------|------------------------------------|------------------------------------|------------------------------------|
| <b>Left UF</b>    | N streamlines             | Rho Spearman = -0.429<br>p = 0.397 | Rho Spearman = -0.309<br>p = 0.552 | Rho Spearman = -0.429<br>p = 0.397 |
|                   | Fractional anisotropy     | Rho Spearman = -0.543<br>p = 0.266 | Rho Spearman = -0.309<br>p = 0.552 | Rho Spearman = -0.543<br>p = 0.266 |
|                   | Axial diffusivity         | Rho Spearman = -0.486<br>p = 0.329 | Rho Spearman = -0.494<br>p = 0.320 | Rho Spearman = -0.486<br>p = 0.329 |
|                   | Perpendicular diffusivity | Rho Spearman = 0.371<br>p = 0.468  | Rho Spearman = 0.154<br>p = 0.770  | Rho Spearman = 0.371<br>p = 0.468  |
| <b>Right UF</b>   | N streamlines             | Rho Spearman = 0.029<br>p = 0.957  | Rho Spearman = 0.093<br>p = 0.862  | Rho Spearman = 0.029<br>p = 0.957  |
|                   | Fractional anisotropy     | Rho Spearman = -0.600<br>p = 0.208 | Rho Spearman = -0.617<br>p = 0.192 | Rho Spearman = -0.600<br>p = 0.208 |
|                   | Axial diffusivity         | Rho Spearman = -0.429<br>p = 0.397 | Rho Spearman = -0.247<br>p = 0.637 | Rho Spearman = -0.429<br>p = 0.397 |
|                   | Perpendicular diffusivity | Rho Spearman = 0.200<br>p = 0.704  | Rho Spearman = 0.154<br>p = 0.770  | Rho Spearman = 0.200<br>p = 0.704  |
| <b>Left IFOF</b>  | N streamlines             | Rho Spearman = 0.771<br>p = 0.072  | Rho Spearman = 0.617<br>p = 0.192  | Rho Spearman = 0.771<br>p = 0.072  |
|                   | Fractional anisotropy     | Rho Spearman = -0.143<br>p = 0.787 | Rho Spearman = -0.031<br>p = 0.954 | Rho Spearman = -0.143<br>p = 0.787 |
|                   | Axial diffusivity         | Rho Spearman = 0.086<br>p = 0.872  | Rho Spearman = 0.309<br>p = 0.552  | Rho Spearman = 0.086<br>p = 0.872  |
|                   | Perpendicular diffusivity | Rho Spearman = 0.145<br>p = 0.784  | Rho Spearman = 0.250<br>p = 0.632  | Rho Spearman = 0.145<br>p = 0.784  |
| <b>Right IFOF</b> | N streamlines             | Rho Spearman = 0.371<br>p = 0.468  | Rho Spearman = 0.093<br>p = 0.862  | Rho Spearman = 0.371<br>p = 0.468  |
|                   | Fractional anisotropy     | Rho Spearman = -0.829<br>p = 0.420 | Rho Spearman = -0.617<br>p = 0.192 | Rho Spearman = -0.829<br>p = 0.042 |
|                   | Axial diffusivity         | Rho Spearman = 0.029<br>p = 0.957  | Rho Spearman = 0.154<br>p = 0.770  | Rho Spearman = 0.029<br>p = 0.957  |
|                   | Perpendicular diffusivity | Rho Spearman = 0.600<br>p = 0.208  | Rho Spearman = 0.463<br>p = 0.355  | Rho Spearman = 0.600<br>p = 0.208  |
| <b>Left ILF</b>   | N streamlines             | Rho Spearman = 0.314<br>p = 0.544  | Rho Spearman = 0.494<br>p = 0.320  | Rho Spearman = 0.371<br>p = 0.468  |
|                   | Fractional anisotropy     | Rho Spearman = -0.371<br>p = 0.468 | Rho Spearman = -0.062<br>p = 0.908 | Rho Spearman = -0.371<br>p = 0.468 |
|                   | Axial diffusivity         | Rho Spearman = -0.200<br>p = 0.704 | Rho Spearman = 0.062<br>p = 0.908  | Rho Spearman = -0.200<br>p = 0.704 |
|                   | Perpendicular diffusivity | Rho Spearman = -0.086<br>p = 0.872 | Rho Spearman = -0.247<br>p = 0.637 | Rho Spearman = -0.086<br>p = 0.872 |



|                  |                           |                                    |                                    |                                    |
|------------------|---------------------------|------------------------------------|------------------------------------|------------------------------------|
| <b>Right ILF</b> | N streamlines             | Rho Spearman = 0.116<br>p = 0.827  | Rho Spearman = 0.000<br>p = 1.000  | Rho Spearman = 0.116<br>p = 0.827  |
|                  | Fractional anisotropy     | Rho Spearman = -0.771<br>p = 0.072 | Rho Spearman = -0.617<br>p = 0.192 | Rho Spearman = -0.771<br>p = 0.072 |
|                  | Axial diffusivity         | Rho Spearman = 0.429<br>p = 0.397  | Rho Spearman = 0.617<br>p = 0.192  | Rho Spearman = 0.429<br>p = 0.397  |
|                  | Perpendicular diffusivity | Rho Spearman = 0.314<br>p = 0.544  | Rho Spearman = 0.309<br>p = 0.552  | Rho Spearman = 0.314<br>p = 0.544  |

UF = Uncinate Fasciculus; IFOF = Inferior Fronto-Occipital Fasciculus; ILF = Inferior Longitudinal Fasciculus; FBI = Frontal Behavioral Inventory.

N streamlines = Number of streamlines

**Table e-7. Correlations between tract-specific measurements of the tracts of interest and neuropsychiatric assessments in patients with Semantic variant of Primary Progressive Aphasia.**

| Tract             | DTI                       | FBI negative scores                | FBI positive scores                | FBI total scores                   |
|-------------------|---------------------------|------------------------------------|------------------------------------|------------------------------------|
| <b>Left UF</b>    | N streamlines             | Rho Spearman = -0.429<br>p = 0.397 | Rho Spearman = -0.257<br>p = 0.623 | Rho Spearman = -0.257<br>p = 0.623 |
|                   | Fractional anisotropy     | Rho Spearman = -0.486<br>p = 0.329 | Rho Spearman = -0.371<br>p = 0.468 | Rho Spearman = -0.371<br>p = 0.468 |
|                   | Axial diffusivity         | Rho Spearman = 0.714<br>p = 0.111  | Rho Spearman = 0.771<br>p = 0.072  | Rho Spearman = 0.771<br>p = 0.072  |
|                   | Perpendicular diffusivity | Rho Spearman = 0.543<br>p = 0.266  | Rho Spearman = 0.600<br>p = 0.208  | Rho Spearman = 0.543<br>p = 0.266  |
| <b>Right UF</b>   | N streamlines             | Rho Spearman = -0.314<br>p = 0.544 | Rho Spearman = -0.429<br>p = 0.397 | Rho Spearman = -0.314<br>p = 0.544 |
|                   | Fractional anisotropy     | Rho Spearman = -0.429<br>p = 0.397 | Rho Spearman = -0.257<br>p = 0.623 | Rho Spearman = -0.257<br>p = 0.623 |
|                   | Axial diffusivity         | Rho Spearman = 0.829<br>p = 0.042  | Rho Spearman = 0.829<br>p = 0.042  | Rho Spearman = 0.886<br>p = 0.019  |
|                   | Perpendicular diffusivity | Rho Spearman = 0.429<br>p = 0.397  | Rho Spearman = 0.257<br>p = 0.623  | Rho Spearman = 0.257<br>p = 0.623  |
| <b>Left IFOF</b>  | N streamlines             | Rho Spearman = 0.600<br>p = 0.208  | Rho Spearman = -0.200<br>p = 0.704 | Rho Spearman = 0.257<br>p = 0.623  |
|                   | Fractional anisotropy     | Rho Spearman = 0.543<br>p = 0.266  | Rho Spearman = 0.486<br>p = 0.329  | Rho Spearman = 0.657<br>p = 0.156  |
|                   | Axial diffusivity         | Rho Spearman = 0.677<br>p = 0.344  | Rho Spearman = 0.600<br>p = 0.208  | Rho Spearman = 0.886<br>p = 0.019  |
|                   | Perpendicular diffusivity | Rho Spearman = 0.257<br>p = 0.623  | Rho Spearman = 0.029<br>p = 0.957  | Rho Spearman = 0.029<br>p = 0.957  |
| <b>Right IFOF</b> | N streamlines             | Rho Spearman = -0.029<br>p = 0.957 | Rho Spearman = 0.086<br>p = 0.872  | Rho Spearman = 0.143<br>p = 0.787  |
|                   | Fractional anisotropy     | Rho Spearman = 0.200<br>p = 0.704  | Rho Spearman = 0.029<br>p = 0.957  | Rho Spearman = 0.257<br>p = 0.623  |
|                   | Axial diffusivity         | Rho Spearman = 0.829<br>p = 0.042  | Rho Spearman = 0.257<br>p = 0.623  | Rho Spearman = 0.657<br>p = 0.156  |
|                   | Perpendicular diffusivity | Rho Spearman = 0.600<br>p = 0.208  | Rho Spearman = 0.029<br>p = 0.957  | Rho Spearman = 0.257<br>p = 0.623  |
| <b>Left ILF</b>   | N streamlines             | Rho Spearman = 0.657<br>p = 0.156  | Rho Spearman = 0.200<br>p = 0.704  | Rho Spearman = 0.543<br>p = 0.266  |
|                   | Fractional anisotropy     | Rho Spearman = 0.257<br>p = 0.623  | Rho Spearman = 0.029<br>p = 0.957  | Rho Spearman = 0.200<br>p = 0.704  |
|                   | Axial diffusivity         | Rho Spearman = 0.543<br>p = 0.266  | Rho Spearman = 0.714<br>p = 0.111  | Rho Spearman = 0.771<br>p = 0.072  |
|                   | Perpendicular diffusivity | Rho Spearman = -0.200<br>p = 0.704 | Rho Spearman = 0.200<br>p = 0.704  | Rho Spearman = -0.029<br>p = 0.957 |
| <b>Right ILF</b>  | N streamlines             | Rho Spearman = -0.314<br>p = 0.544 | Rho Spearman = -0.086<br>p = 0.872 | Rho Spearman = -0.143<br>p = 0.787 |
|                   | Fractional anisotropy     | Rho Spearman = -0.371              | Rho Spearman = -0.086<br>p = 0.872 | Rho Spearman = -0.143<br>p = 0.787 |

|  |                           |                                   |                                   |                                   |
|--|---------------------------|-----------------------------------|-----------------------------------|-----------------------------------|
|  |                           | p = 0.468                         |                                   |                                   |
|  | Axial diffusivity         | Rho Spearman = 0.886<br>p = 0.019 | Rho Spearman = 0.657<br>p = 0.156 | Rho Spearman = 0.886<br>p = 0.019 |
|  | Perpendicular diffusivity | Rho Spearman = 0.429<br>p = 0.397 | Rho Spearman = 0.314<br>p = 0.544 | Rho Spearman = 0.314<br>p = 0.544 |

UF = Uncinate Fasciculus; IFOF = Inferior Fronto-Occipital Fasciculus; ILF = Inferior Longitudinal Fasciculus; FBI = Frontal Behavioral Inventory.  
N streamlines = Number of streamlines

**Table e-8. Correlations between tract-specific measurements of the tracts of interest and neuropsychiatric assessments in patients with unclassified variant of Primary Progressive Aphasia.**

| Tract             | DTI                       | FBI negative scores                | FBI positive scores                | FBI total scores                   |
|-------------------|---------------------------|------------------------------------|------------------------------------|------------------------------------|
| <b>Left UF</b>    | N streamlines             | Rho Spearman = -0.198<br>p = 0.670 | Rho Spearman = -0.158<br>p = 0.736 | Rho Spearman = -0.162<br>p = 0.728 |
|                   | Fractional anisotropy     | Rho Spearman = -0.198<br>p = 0.670 | Rho Spearman = 0.729<br>p = 0.063  | Rho Spearman = -0.054<br>p = 0.908 |
|                   | Axial diffusivity         | Rho Spearman = 0.468<br>p = 0.289  | Rho Spearman = 0.020<br>p = 0.967  | Rho Spearman = 0.505<br>p = 0.248  |
|                   | Perpendicular diffusivity | Rho Spearman = 0.414<br>p = 0.355  | Rho Spearman = -0.315<br>p = 0.491 | Rho Spearman = 0.378<br>p = 0.403  |
| <b>Right UF</b>   | N streamlines             | Rho Spearman = -0.775<br>p = 0.041 | Rho Spearman = -0.512<br>p = 0.240 | Rho Spearman = -0.847<br>p = 0.016 |
|                   | Fractional anisotropy     | Rho Spearman = -0.108<br>p = 0.818 | Rho Spearman = 0.059<br>p = 0.900  | Rho Spearman = -0.144<br>p = 0.758 |
|                   | Axial diffusivity         | Rho Spearman = 0.721<br>p = 0.068  | Rho Spearman = 0.118<br>p = 0.801  | Rho Spearman = 0.757<br>p = 0.049  |
|                   | Perpendicular diffusivity | Rho Spearman = 0.414<br>p = 0.355  | Rho Spearman = 0.118<br>p = 0.801  | Rho Spearman = 0.487<br>p = 0.268  |
| <b>Left IFOF</b>  | N streamlines             | Rho Spearman = -0.757<br>p = 0.490 | Rho Spearman = -0.217<br>p = 0.641 | Rho Spearman = -0.793<br>p = 0.333 |
|                   | Fractional anisotropy     | Rho Spearman = -0.378<br>p = 0.403 | Rho Spearman = 0.591<br>p = 0.162  | Rho Spearman = -0.270<br>p = 0.558 |
|                   | Axial diffusivity         | Rho Spearman = 0.468<br>p = 0.289  | Rho Spearman = -0.158<br>p = 0.736 | Rho Spearman = 0.432<br>p = 0.333  |
|                   | Perpendicular diffusivity | Rho Spearman = 0.216<br>p = 0.641  | Rho Spearman = -0.493<br>p = 0.261 | Rho Spearman = 0.144<br>p = 0.758  |
| <b>Right IFOF</b> | N streamlines             | Rho Spearman = -0.378<br>p = 0.403 | Rho Spearman = 0.256<br>p = 0.579  | Rho Spearman = -0.342<br>p = 0.452 |
|                   | Fractional anisotropy     | Rho Spearman = -0.324<br>p = 0.478 | Rho Spearman = 0.256<br>p = 0.579  | Rho Spearman = -0.288<br>p = 0.531 |
|                   | Axial diffusivity         | Rho Spearman = 0.396<br>p = 0.379  | Rho Spearman = 0.374<br>p = 0.408  | Rho Spearman = 0.468<br>p = 0.289  |
|                   | Perpendicular diffusivity | Rho Spearman = 0.432<br>p = 0.333  | Rho Spearman = 0.079<br>p = 0.867  | Rho Spearman = 0.468<br>p = 0.289  |
| <b>Left ILF</b>   | N streamlines             | Rho Spearman = 0.144<br>p = 0.758  | Rho Spearman = -0.729<br>p = 0.063 | Rho Spearman = 0.000<br>p = 1.000  |
|                   | Fractional anisotropy     | Rho Spearman = -0.162<br>p = 0.728 | Rho Spearman = 0.394<br>p = 0.382  | Rho Spearman = -0.126<br>p = 0.788 |
|                   | Axial diffusivity         | Rho Spearman = 0.360<br>p = 0.427  | Rho Spearman = -0.335<br>p = 0.463 | Rho Spearman = 0.252<br>p = 0.585  |
|                   | Perpendicular diffusivity | Rho Spearman = 0.108<br>p = 0.818  | Rho Spearman = -0.394<br>p = 0.382 | Rho Spearman = 0.072<br>p = 0.878  |
| <b>Right ILF</b>  | N streamlines             | Rho Spearman = -0.109<br>p = 0.816 | Rho Spearman = -0.716<br>p = 0.071 | Rho Spearman = -0.109<br>p = 0.816 |

|  |                           |                                    |                                    |                                    |
|--|---------------------------|------------------------------------|------------------------------------|------------------------------------|
|  | Fractional anisotropy     | Rho Spearman = -0.378<br>p = 0.403 | Rho Spearman = 0.591<br>p = 0.162  | Rho Spearman = -0.270<br>p = 0.558 |
|  | Axial diffusivity         | Rho Spearman = 0.234<br>p = 0.613  | Rho Spearman = 0.236<br>p = 0.610  | Rho Spearman = 0.306<br>p = 0.504  |
|  | Perpendicular diffusivity | Rho Spearman = 0.162<br>p = 0.728  | Rho Spearman = -0.059<br>p = 0.900 | Rho Spearman = 0.198<br>p = 0.670  |

UF = Uncinate Fasciculus; IFOF = Inferior Fronto-Occipital Fasciculus; ILF = Inferior Longitudinal Fasciculus; FBI = Frontal Behavioral Inventory.  
N streamlines = Number of streamlines
